# Supplementary material
Source: PubMed Central journal article supplement (PMC10991095)
Supplement: 262_2022_3249_MOESM1_ESM.pdf [file 262_2022_3249_MOESM1_ESM.pdf]

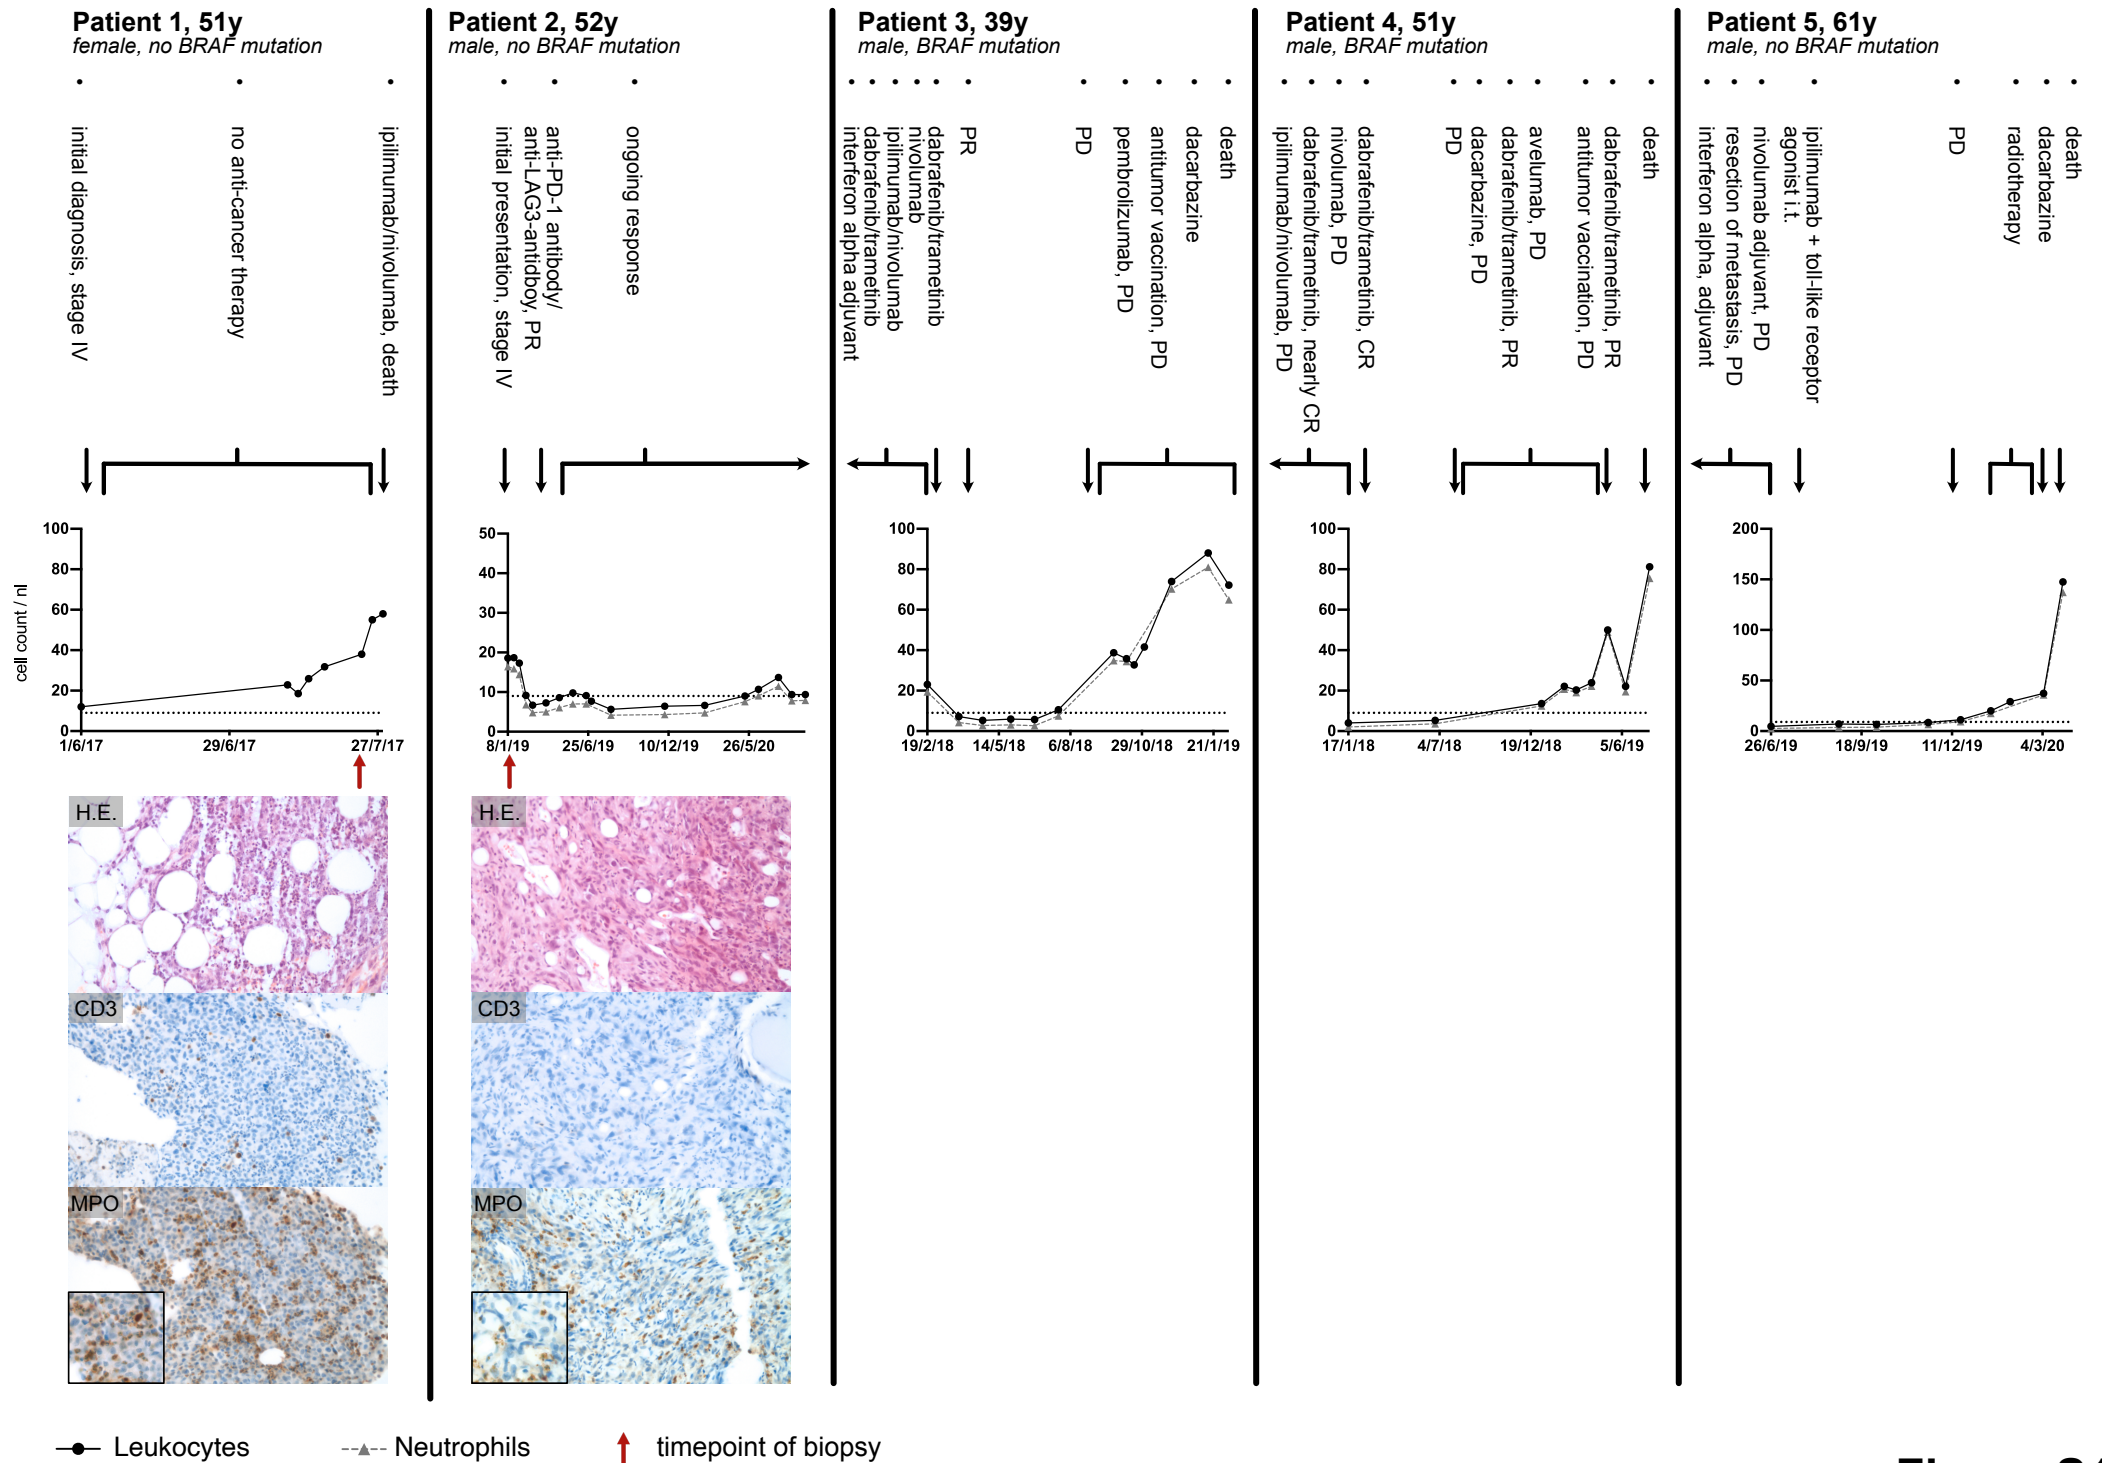

Figure S1

**Figure S1 Scheme of treatment and histology** Timeline of each patient, showing sequence and timepoints of each anti-cancer therapy in correlation with leucocyte count (round-dotted line) and neutrophil count (triangular-dotted line). Red arrows indicate time point of metastasis biopsy. Histological images of a metastasis during leukemoid reaction of patient 1 and patient 2 are shown. Upper image: 200x HE-morphological image. Middle image: 200x CD3-staining for lymphocytes. Lower image: 200x and 400x MPO staining of same metastasis, highlighting neutrophil granulocytes.
